# Supplementary material for: Anisotropic polydopamine capsules with an ellipsoidal shape that can tolerate harsh conditions: efficient adsorbents for organic dyes and precursors for ellipsoidal hollow carbon particles
Source: Royal Society of Chemistry journal article supplement (doi:10.1039/c7ra02235b), 2017-01-01
Supplement: c7ra02235b1.pdf [file c7ra02235b1.pdf]

**Electronic Supplementary Information for**  
**Anisotropic Polydopamine Capsules with an Ellipsoidal Shape that**  
**Can Tolerate Harsh Conditions: Efficient Adsorbents for Organic**  
**Dyes and Precursors for Ellipsoidal Hollow Carbon Particles**

*Lu Yang<sup>+,1</sup>, Cong Wang<sup>+,1</sup>, Zihan Ye<sup>2</sup>, Pengjiao Zhang<sup>2</sup>, Songhai Wu<sup>1,\*</sup>, Shaoyi Jia<sup>1</sup>,  
Zhanyong Li, Zhenkun Zhang<sup>2,\*</sup>*

1) School of Chemical Engineering and Technology, Tianjin University, Tianjin  
300072, China.

2) Key Laboratory of Functional Polymer Materials of Ministry of Education,  
Institute of Polymer Chemistry, College of Chemistry, Nankai University, Tianjin  
300071, China.

E-mail: wusonghai@tju.edu.cn; zkzhang@nankai.edu.cn.

+ These authors contributed equally to this work.

## Supplementary Tables and Figures

**Table S1.** List of the adsorption of capacity ( $q$ ) of various kinds of adsorbents for MB at 298k

| Adsorbents                                                                         | $q$ (mg/g) | Refs.     |
|------------------------------------------------------------------------------------|------------|-----------|
| Poly(cyclotriphosphazene-co-4,4'-sulfonyldiphenol) nanospheres                     | 20         | [1]       |
| Carbon nanotubes                                                                   | 35         | [2]       |
| Multi-walled carbon nanotubes filled with Fe <sub>2</sub> O <sub>3</sub> particles | 42.3       | [3]       |
| Coconut husk based activated carbon                                                | 66         | [4]       |
| Poly(cyclotriphosphazene-co-4,4'-sulfonyldiphenol) nanotubes                       | 69.16      | [5]       |
| ZnCo <sub>2</sub> O <sub>4</sub> microspheres                                      | 79.1       | [6]       |
| Halloysite nanotubes                                                               | 84.32      | [7]       |
| <b>PDA microspheres</b>                                                            | 90.7       | [8]       |
| Palm kernel fiber                                                                  | 95.4       | [9]       |
| Citric acid modified mixed hardwoods power                                         | 237.4      | [10]      |
| <b>Ellipsoidal PDA capsules</b>                                                    | 200        | This work |

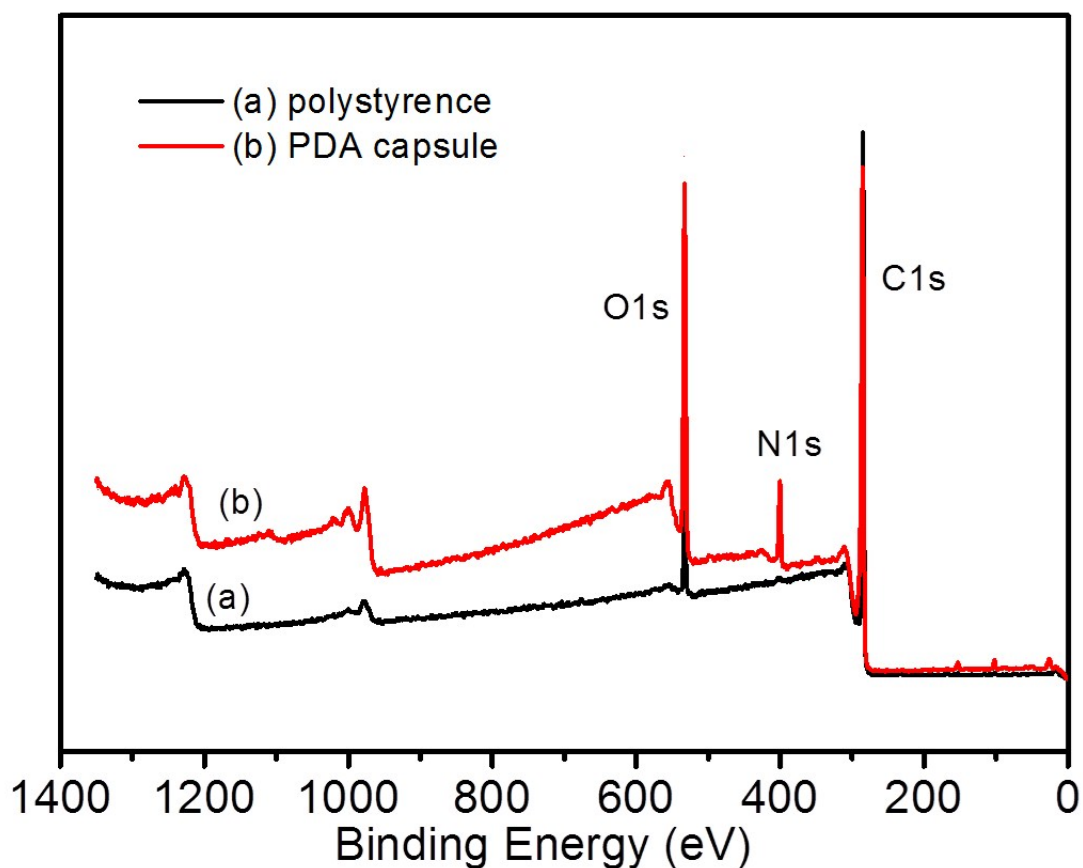

**Figure S1.** XPS survey spectra of polystyrene ellipsoids (a) and PDA capsules (b). The PDA capsules are obtained from PDA coating of micrometer-sized PS ellipsoids with an aspect ratio of 3.

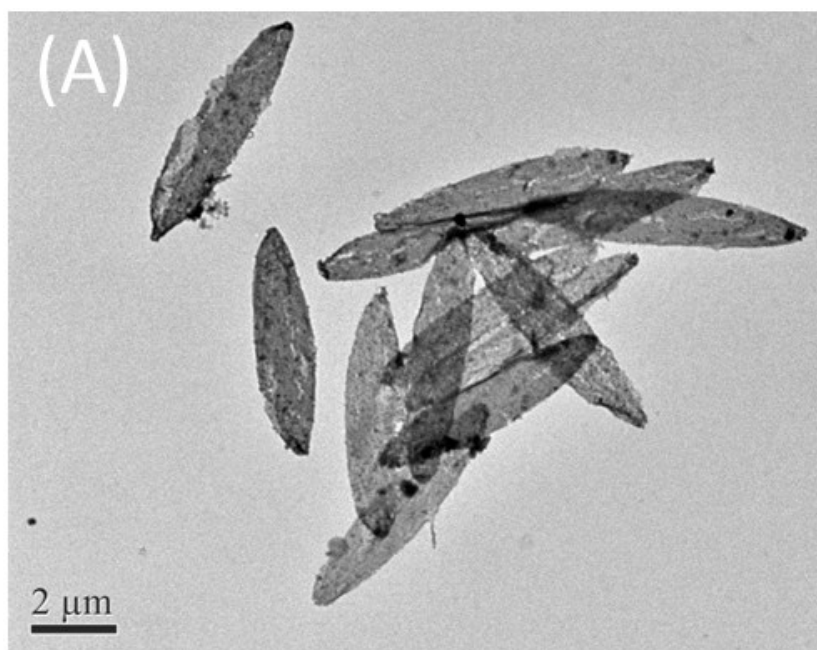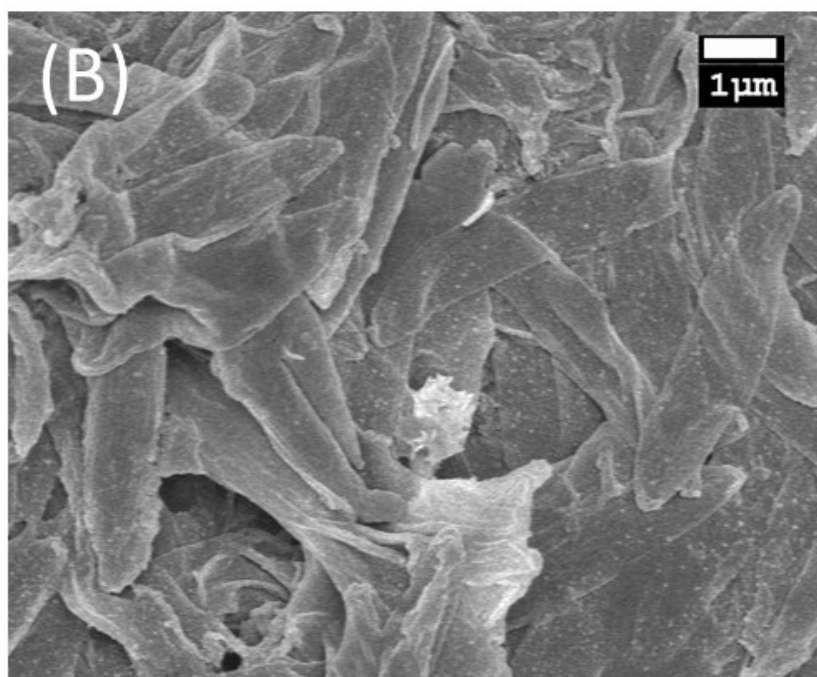

**Figure S2.** PDA capsules from PDA coating of micrometer-sized PS ellipsoids with an aspect ratio of 6. Coating conditions: 0.04 mg mL<sup>-1</sup> dopamine in Tris-HCl buffer (10 mM, pH = 8.5). The coating time was 10 hours.

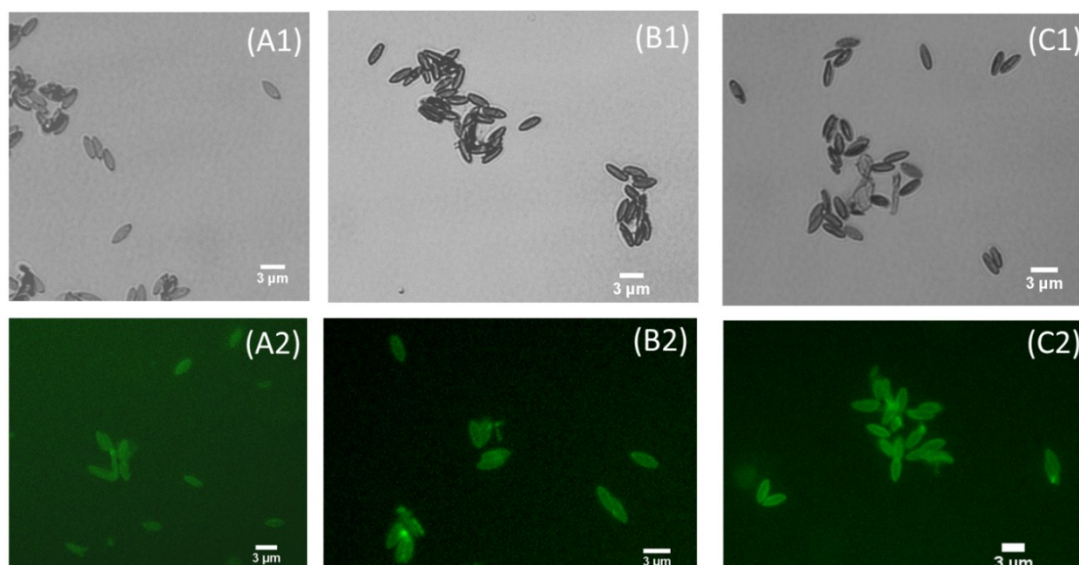

**Figure S3.** Differential interference contrast (DIC) and fluorescent microscopy of ellipsoidal PDA capsules obtained from iterating PDA coating of the micrometer-sized PS ellipsoid with an aspect ratio of 3. Top column: DIC images; Bottom column: fluorescent images. Images in (A), (B) and (C) are PDA capsules obtained from two, three and four cycles of coating, respectively. Coating conditions: the dopamine concentration is  $0.1 \text{ mg mL}^{-1}$  in Tris-HCl buffer (10 mM, pH = 8.5) and the coating time is 10 hrs.

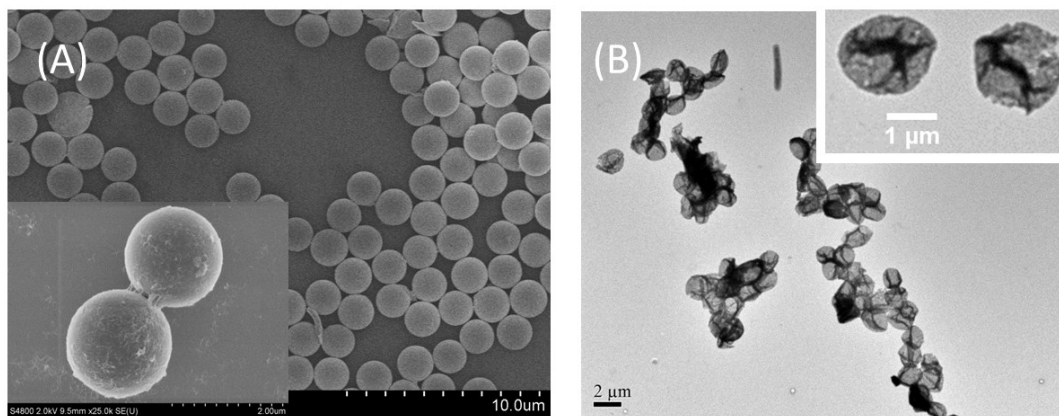

**Figure S4.** PDA coated of PS spheres (A) and spherical PDA capsules by dissolving away the PS templates (B). Coating conditions: the dopamine concentration is  $0.1 \text{ mg mL}^{-1}$  in Tris-HCl buffer (10 mM, pH = 8.5) and the coating time is 10 hrs.

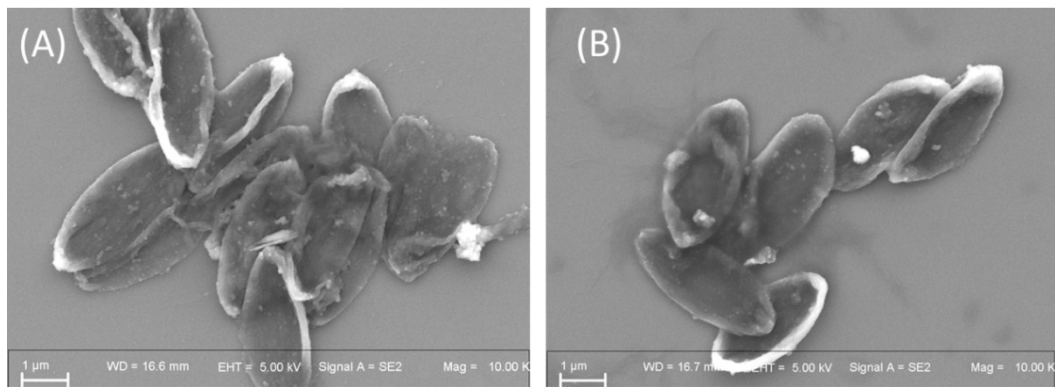

**Figure S5.** Influence of the coating time on the morphology of PDA capsules. The coating time is 15 (A) and 25 hours (B), respectively. The template is the micrometer-sized PS ellipsoid with an aspect ratio of 3. Coating conditions: 0.1 mg mL<sup>-1</sup> dopamine in Tris-HCl buffer (10 mM, pH = 8.5).

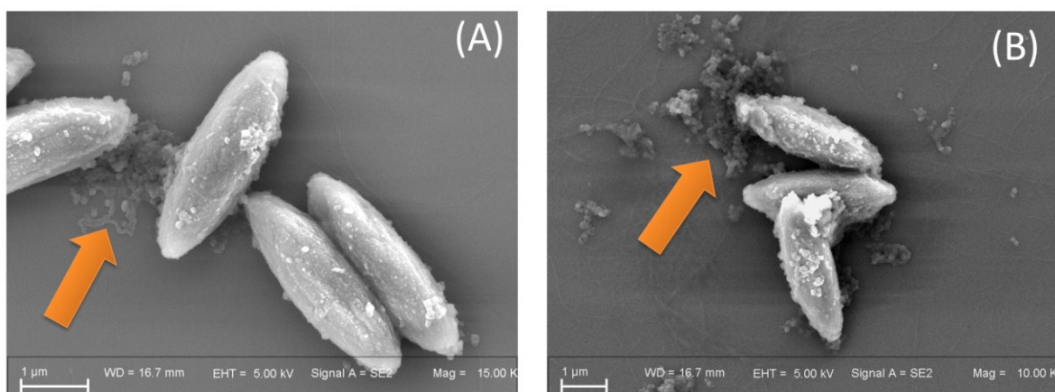

**Figure S6.** Influence of the initial dopamine concentration on the morphology of PDA capsules. The initial dopamine concentration is 1 (A) and 2 mg mL<sup>-1</sup> (B), respectively. The template is the micrometer-sized PS ellipsoid with an aspect ratio of 3. The coating time is 10 hours. Arrows in (A) and (B) highlight the pure PDA side products.

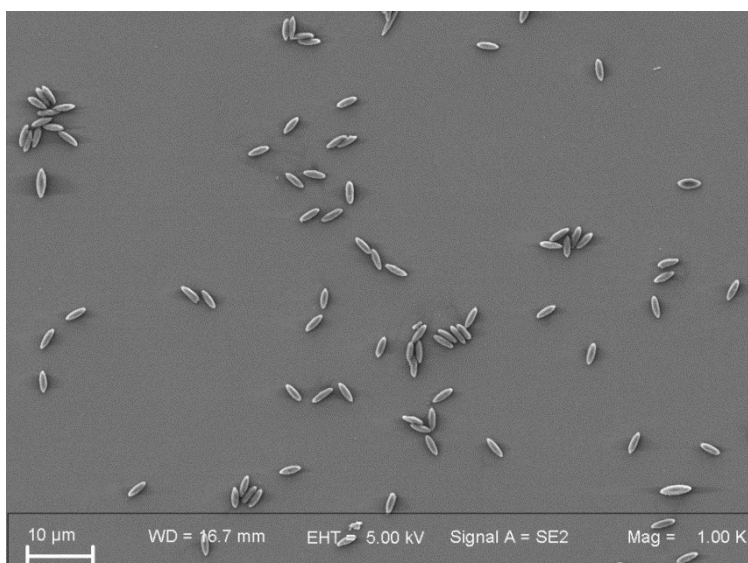

**Figure S7.** Overview of SEM of PDA capsules obtained from four-time PDA coating of the micrometer-sized PS ellipsoid with an aspect ratio of 3. The coating time is 10 hours.

## References

- [1] Z. Chen, J. Fu, M. Wang, X. Wang, J. Zhang, and Q. Xu, "Adsorption of cationic dye (methylene blue) from aqueous solution using poly(cyclotriphosphazene-co-4,4'-sulfonyldiphenol) nanospheres," *Applied Surface Science*, 2014, vol. 289, pp. 495-501.
- [2] Y. Yao, F. Xu, M. Chen, Z. Xu, and Z. Zhu, "Adsorption behavior of methylene blue on carbon nanotubes," *Bioresour Technol*, May 2010, vol. 101, pp. 3040-6.
- [3] S. Qu, F. Huang, S. Yu, G. Chen, and J. Kong, "Magnetic removal of dyes from aqueous solution using multi-walled carbon nanotubes filled with Fe<sub>2</sub>O<sub>3</sub> particles," *J Hazard Mater*, Dec 30 2008, vol. 160, pp. 643-7.
- [4] H. Tamai, T. Kakii, Y. Hirota, T. Kumamoto, and H. Yasuda, "Synthesis of Extremely Large Mesoporous Activated Carbon and Its Unique Adsorption for Giant Molecules," *Chemistry of Materials*, 1996, vol. 8, pp. 454-462, 1996/01/01.
- [5] Z. Chen, J. Zhang, J. Fu, M. Wang, X. Wang, R. Han, *et al.*, "Adsorption of methylene blue onto poly(cyclotriphosphazene-co-4,4'-sulfonyldiphenol) nanotubes: kinetics, isotherm and thermodynamics analysis," *J Hazard Mater*, May 30 2014, vol. 273, pp. 263-71.
- [6] H. Guo, J. Chen, W. Weng, Q. Wang, and S. Li, "Facile template-free one-pot fabrication of ZnCo<sub>2</sub>O<sub>4</sub> microspheres with enhanced photocatalytic activities under visible-light illumination," *Chemical Engineering Journal*, 2014, vol. 239, pp. 192-199.
- [7] M. Zhao and P. Liu, "Adsorption behavior of methylene blue on halloysite nanotubes," *Microporous and Mesoporous Materials*, 2008, vol. 112, pp. 419-424.
- [8] J. Fu, Z. Chen, M. Wang, S. Liu, J. Zhang, J. Zhang, *et al.*, "Adsorption of methylene blue by a high-efficiency adsorbent (polydopamine microspheres): Kinetics, isotherm, thermodynamics and mechanism analysis," *Chemical Engineering Journal*, 2015, vol. 259, pp. 53-61.
- [9] G. O. El-Sayed, "Removal of methylene blue and crystal violet from aqueous solutions by

palm kernel fiber," *Desalination*, 2011, vol. 272, pp. 225-232.

- [10] Y.-Z. Zhang, Y.-Q. Jin, Q.-F. Lü, and X.-S. Cheng, "Removal of Copper Ions and Methylene Blue from Aqueous Solution Using Chemically Modified Mixed Hardwoods Powder as a Biosorbent," *Industrial & Engineering Chemistry Research*, 2014, vol. 53, pp. 4247-4253.
